# Supplementary material
Source: publisher figshare collection journal article supplement (https://tandf.figshare.com/ndownloader/files/20478414)

**Supplementary Figure 1.** CYP76A2L caused a hydroxylation of Solanaceae phytoalexins. *N. benthamiana* leaves were inoculated with *Agrobacterium* strains for expression of CYP76A2L, and the leaves were infiltrated with 1 mg/ml solavetivone, lubimin, oxylubimin or rishitin (from top to bottom) 2 d after inoculation. Infiltrated phytoalexins were re-extracted, silylated with TMS and measured using GC-MS. Left: Ion chromatograms of the peaks caused by CYP76A2L expression. Right: The mass spectra for the corresponding peak. A hydroxylation of all four phytoalexins as seen by the M+ peak for each compound (highlighted by black circles). Chemical bonds dotted in grey indicate the presumed location of the hydroxylation.





**Supplementary Figure 2.** Phylogenetic analysis of *S. tuberosum* sesquiterpenoid phytoalexins hydroxylase, StSPH and related cytochrome P450 in *Solanum*, *Capsicum* and *Nicotiana* species. Closest homologs of SPH in *A. thaliana* and *Glycine max* (soybean) were also included. The tree was prepared by the neighbor-joining method. The scale bar corresponds to 0.1 estimated amino acid substitutions per site.


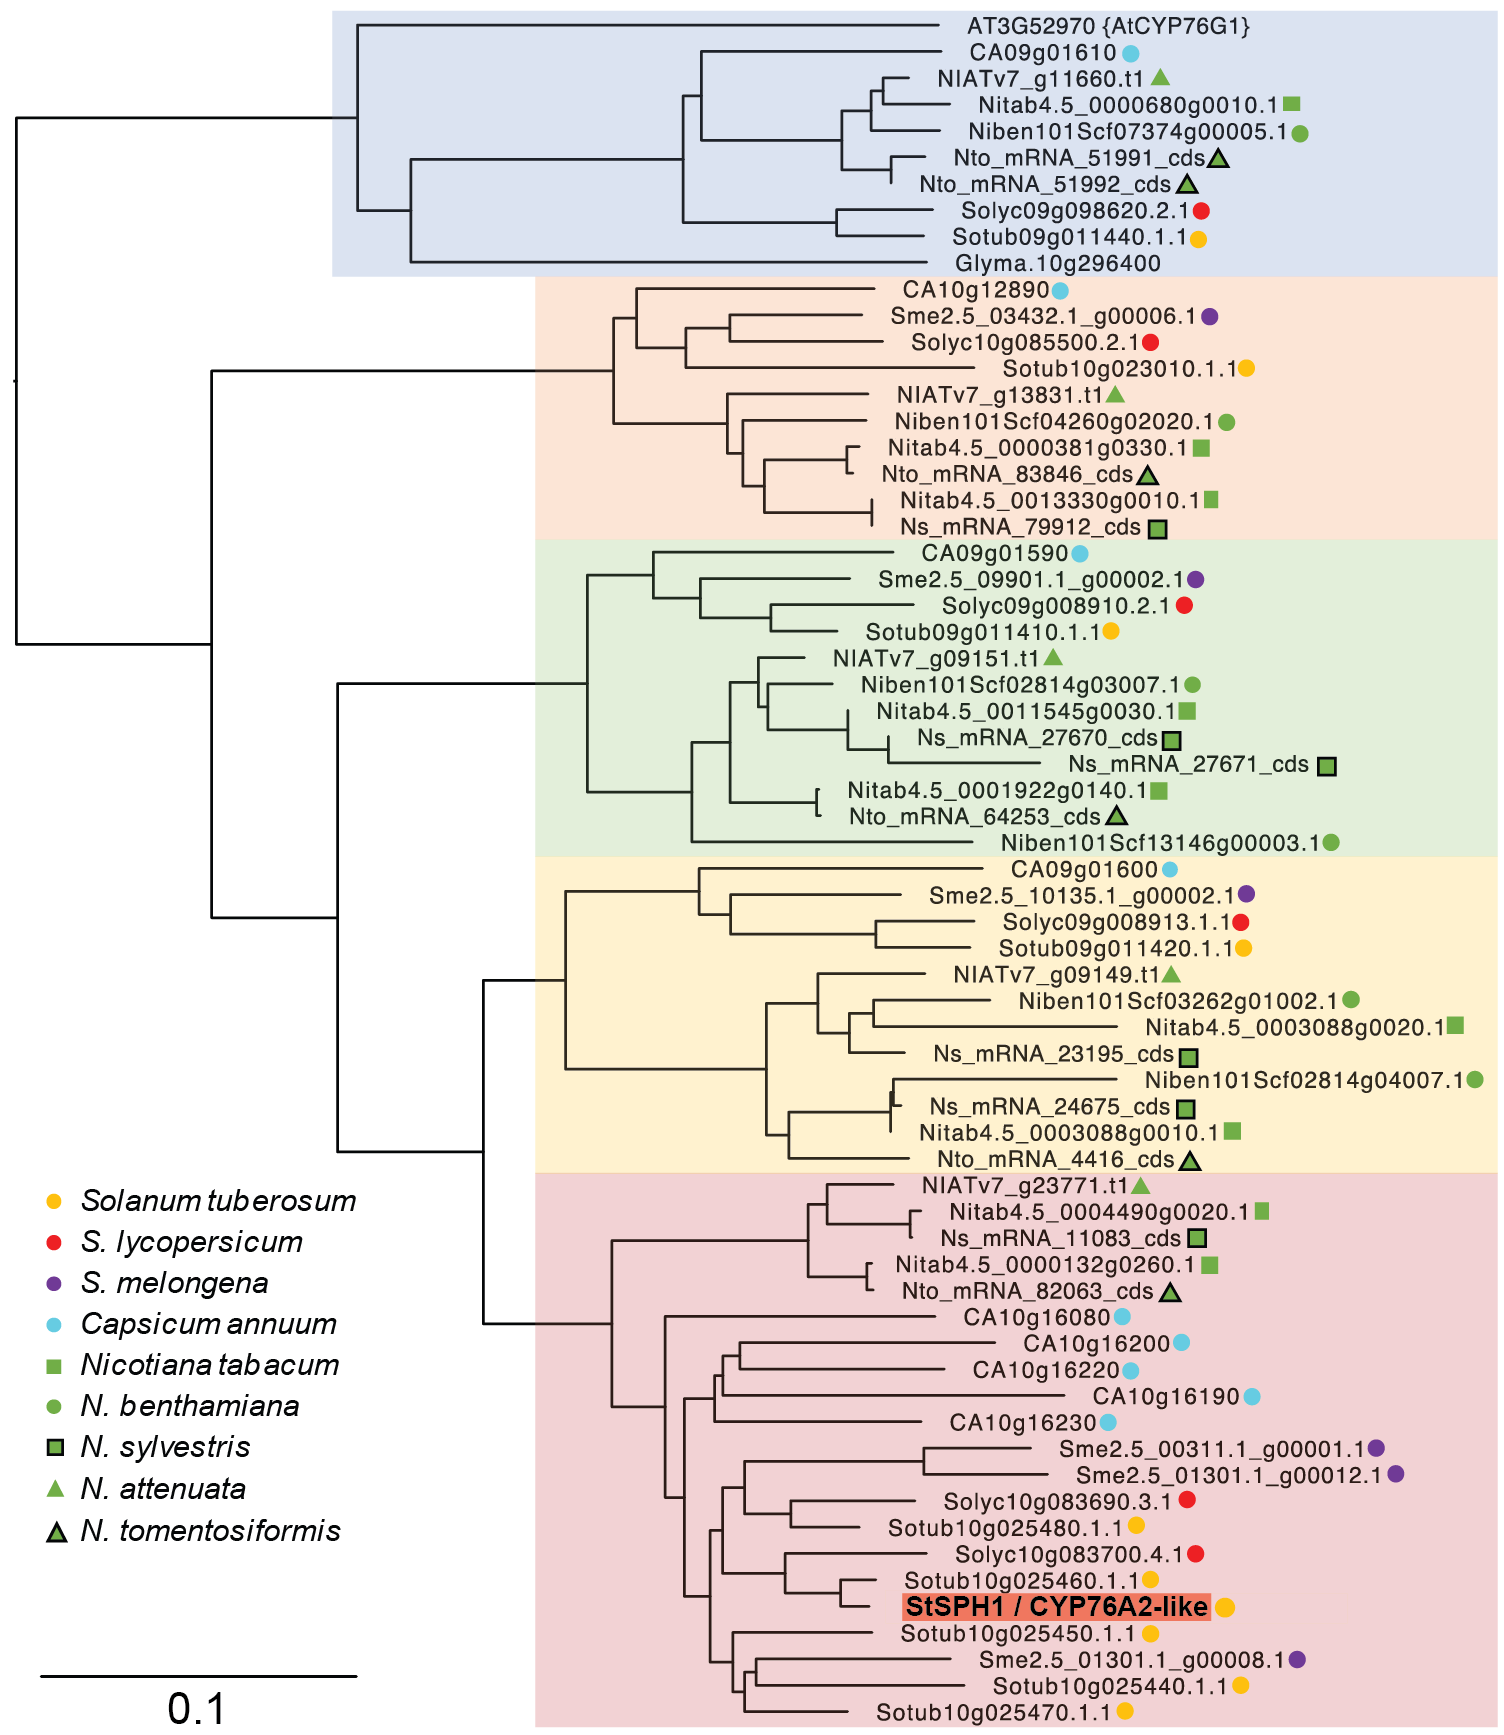

Supplement: Supplementary file 1 [file 20478414]
